# Supplementary material
Source: HighWire-hosted journal article supplement (https://jnm.snmjournals.org/highwire/filestream/94826/field_highwire_adjunct_files/0/162339_Supplemental_Data.pdf)
Supplement: 162339_Supplemental_Data.pdf [file 162339_Supplemental_Data.pdf]

## MATERIALS AND METHODS

### Radiation Dosimetry Estimates

The radiation absorbed doses to the tumor and normal tissues in CD1 athymic mice with MDA-MB-231/H2N xenografts following injection of  $^{111}\text{In}$ -DTPA-Fab-PEG<sub>24</sub>-EGF or  $^{177}\text{Lu}$ -DOTA-Fab-PEG<sub>24</sub>-EGF were estimated from the previously reported biodistribution of  $^{111}\text{In}$ -DTPA-Fab-PEG<sub>24</sub>-EGF (1). The radioactivity in source organs at time points from 4 to 72 h p.i. was calculated by multiplying the %ID/g values by standard organ weights in mice (2) assuming an injected amount of 11.1 MBq (10  $\mu\text{g}$ ). The organ radioactivity was then corrected for radioactive decay by multiplying by  $e^{(-\lambda t)}$ , where  $\lambda$  is the decay constant ( $1.03 \times 10^{-2} \text{ h}^{-1}$  for  $^{111}\text{In}$  and  $4.3 \times 10^{-3} \text{ h}^{-1}$  for  $^{177}\text{Lu}$ ) and  $t$  is the time p.i. Radioactivity in the tumor was similarly calculated by multiplying the %ID/g values by 0.2 g, assuming a tumour of  $200 \pm 30 \text{ mm}^3$  measured in a previous study of  $^{111}\text{In}$ -DTPA-Fab-PEG<sub>24</sub>-EGF (1) and then correcting for radioactive decay. The cumulative radioactivity for the tumor and normal source organs from 0-72 h ( $\tilde{A}_{0-72\text{h}}$ ) was estimated from the area under the curve (AUC) from 0 h to 72 h [ $\text{AUC}_{0-72\text{h}}; \text{Bq} \times \text{sec}$ ] using Prism Ver. 4.0 software (GraphPad Inc., San Diego, CA). The cumulative radioactivity from 72 h to infinity ( $\tilde{A}_{72\text{h}-\infty}$ ) was obtained by dividing the final radioactivity at 72 h by the decay constant, thus assuming elimination after this time point only by radioactive decay. The combined  $\tilde{A}_{0-\infty}$  values for each organ were multiplied by the S-value ( $\text{Gy/Bq} \times \text{sec}$ ) for  $^{111}\text{In}$  and  $^{177}\text{Lu}$  (2) to estimate the radiation absorbed doses (Gy). The dose delivered to the tumor was estimated based on the S-

values using the sphere model in OLINDA/EXT radiation dose assessment software, assuming a tumor with diameter of 3.5 mm (3).

## RESULTS

### **Bispecific Radioimmunoconjugates (bsRICs)**

Fig. S1 1 shows the method of synthesis of the trastuzumab Fab-PEG<sub>24</sub>-EGF bispecific immunoconjugates and their radiolabeling with <sup>177</sup>Lu. The binding of <sup>177</sup>Lu-DOTA-trastuzumab Fab or <sup>177</sup>Lu-DOTA-EGF to MDA-MB-231/H2N cells in the absence or presence of an excess of unlabeled trastuzumab Fab or EGF is shown in Fig. S2.

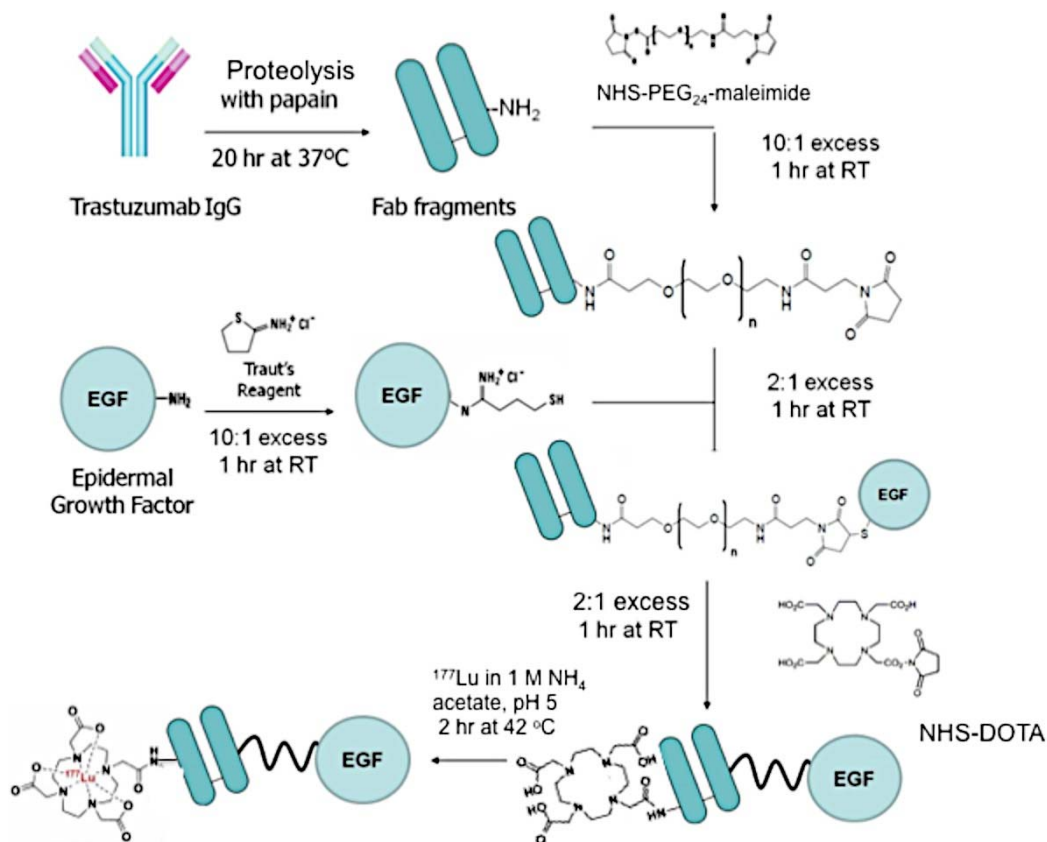

**Supplemental Fig. 1.** Synthesis of bispecific <sup>177</sup>Lu-DOTA-Fab-PEG<sub>24</sub>-EGF radioimmunoconjugates. Fab fragments of trastuzumab produced by proteolytic digestion of the intact IgG were reacted with a 10-fold mole excess of NHS-PEG<sub>24</sub>-maleimide for 1 hour at room temperature (RT). EGF was thiolated by reaction with a 10-fold mole excess of 2-iminothiolane (Traut's reagent) for 1 hour at RT. Then a 2-fold mole excess of thiolated EGF was reacted with maleimide functionalized PEG<sub>24</sub>-Fab for 1 hour at RT. Fab-PEG<sub>24</sub>-EGF immunoconjugates were purified and reacted with a 2-fold mole excess of NHS-DOTA for 1 hour at RT. Following re-purification, DOTA-

Fab-PEG<sub>24</sub>-EGF was labeled with <sup>177</sup>Lu by incubation with <sup>177</sup>LuCl<sub>3</sub> in 1 M ammonium acetate buffer, pH 5.0 for 2 hours at 42 °C. The synthesis of the bispecific radioimmunoconjugates was adapted from Razumienko et al. (1).

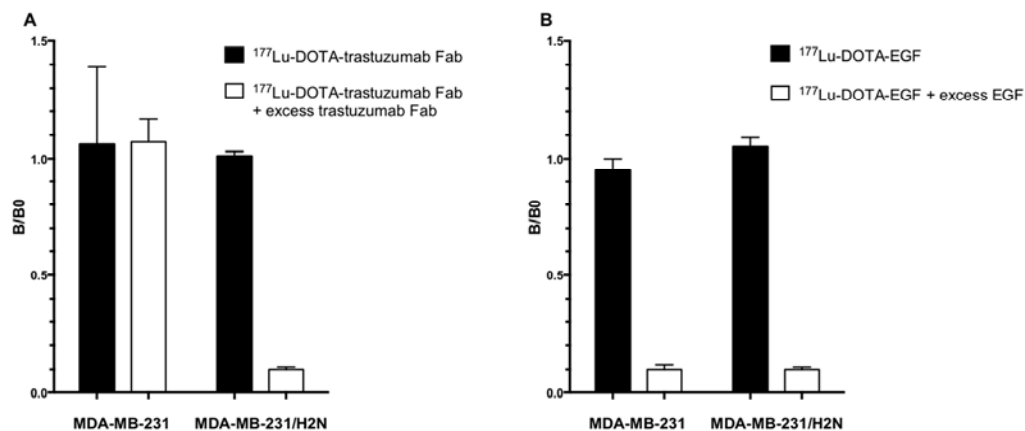

**Supplemental Fig. 2.** Binding of (A) <sup>177</sup>Lu-DOTA-trastuzumab Fab (1 nmol/L) or (B) <sup>177</sup>Lu-DOTA-EGF (6.4 nmols/L) to MDA-MB-231 cells (HER2<sup>low</sup>/EGFR<sup>mod</sup>) and MDA-MB-231/H2N cells (HER2<sup>mod</sup>/EGFR<sup>mod</sup>) in the absence or presence of an excess of unlabeled trastuzumab Fab (69 nmols/L) or EGF (1,659 nmols/L). B/B<sub>0</sub>: Binding in the presence of competitor divided by the binding in the absence of competitor. Values shown represent the mean ± SD (n=3).

## REFERENCES

1. Razumienko E DL, Scollard D, Reilly RM. MicroSPECT/CT imaging of co-expressed HER2 and EGFR on subcutaneous human tumor xenografts in athymic mice using  $^{111}\text{In}$ -labeled bispecific radioimmunoconjugates. *Breast Cancer Res Treat.* 2013;138:709-718.
2. Bitar A, Lisbona A, Thedrez P, et al. A voxel-based mouse for internal dose calculations using Monte Carlo simulations (MCNP). *Phys Med Biol.* 2007;52:1013-1025.
3. Stabin MG, Sparks RB, Crowe E. OLINDA/EXM: the second-generation personal computer software for internal dose assessment in nuclear medicine. *J Nucl Med.* 2005;46:1023-1027.
